# Supplementary material for: Activation of gold decorated carbon nanotube hybrids for targeted gas adsorption and enhanced catalytic oxidation
Source: Royal Society of Chemistry journal article supplement (doi:10.1039/c2jm16458b), 2012-01-01
Supplement: c2jm16458b.pdf [file c2jm16458b.pdf]

Supplementary information

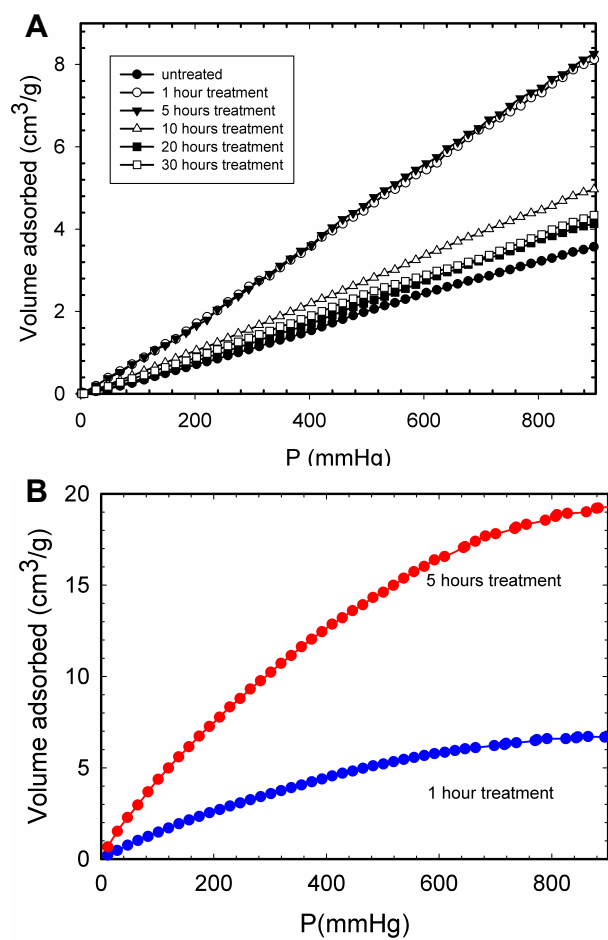

Figure 1 Evidence of CO<sub>2</sub> and H<sub>2</sub> adsorption on the different samples; A: CO<sub>2</sub> adsorption (volume - STP) measured at 293K on the series of samples; and B: H<sub>2</sub> volume adsorbed at 77 K for the 1 h and 5 h plated samples
